# Supplementary material for: In-Situ Fabrication of Electroactive Cu2+-Trithiocyanate Complex and Its Application for Label-Free Electrochemical Aptasensing of Thrombin
Source: MDPI journal article supplement (doi:10.3390/bios13050532), 2023-05-10
Supplement: s1 [file s1]

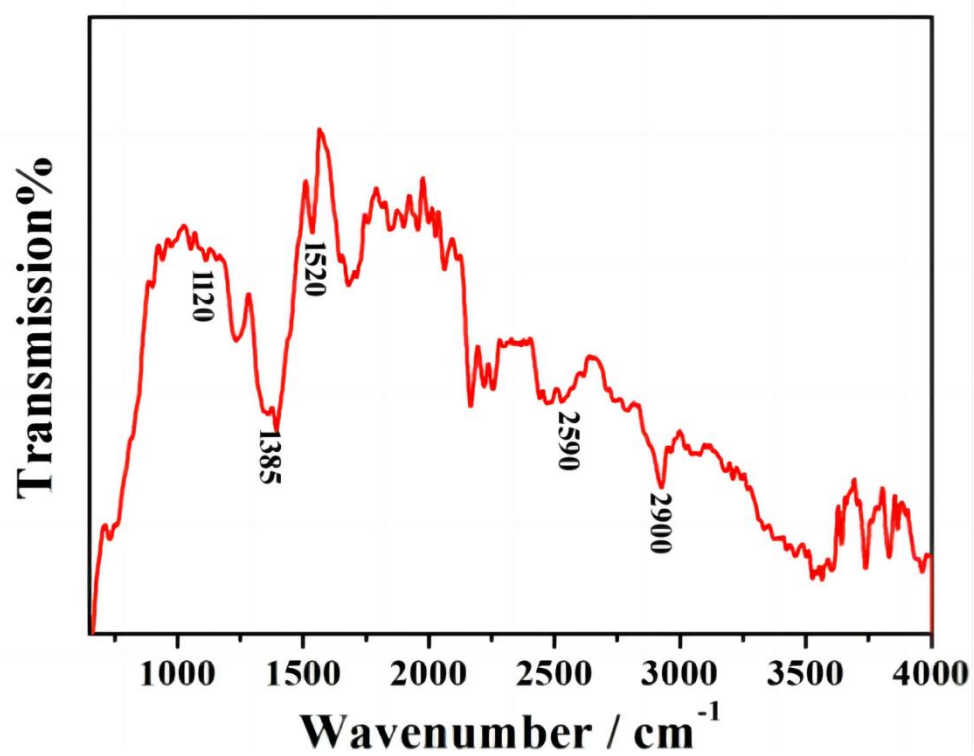

Figure S1. The ATR-FTIR image of p(Cu<sup>2+</sup>-TCY)

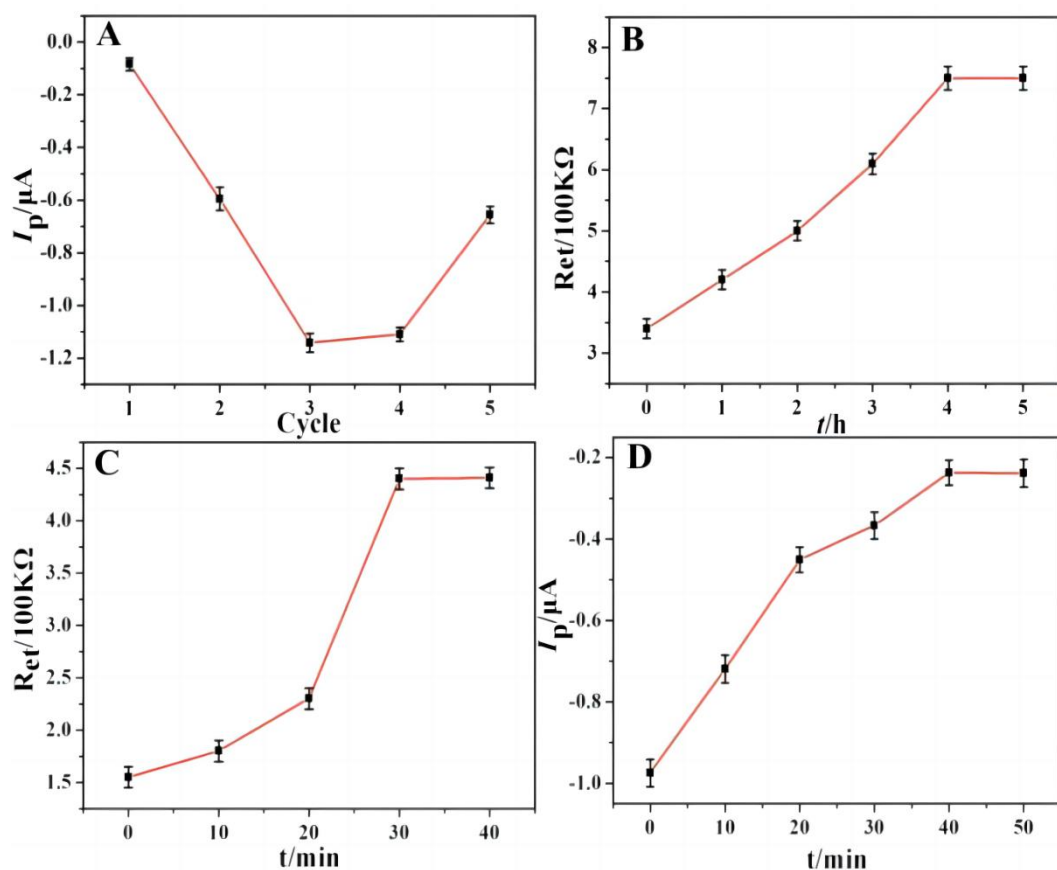

Figure S2. (A) Effect of self-assembly cycles of  $\text{Cu}^{2+}$  and TCY on the peak currents ( $I_p$ ), (B) Effect of immobilization time ( $t$ ) on AuNPs on the  $R_{ct}$  values of the electrode, (C) Effect of immobilization time ( $t$ ) of TBA on the  $R_{ct}$  values of the electrode, and (D) Effect of binding time ( $t$ ) of thrombin on the peak currents ( $I_p$ ) of the aptasensor

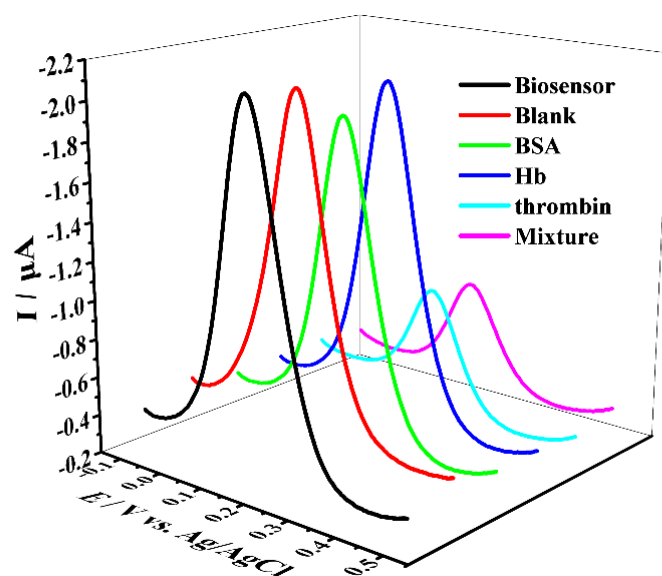

Figure S3. DPVs of the aptasensor after incubation in blank buffer, 10 pM BSA, 10 pM Hb, 1.0 fM thrombin and their mixture.

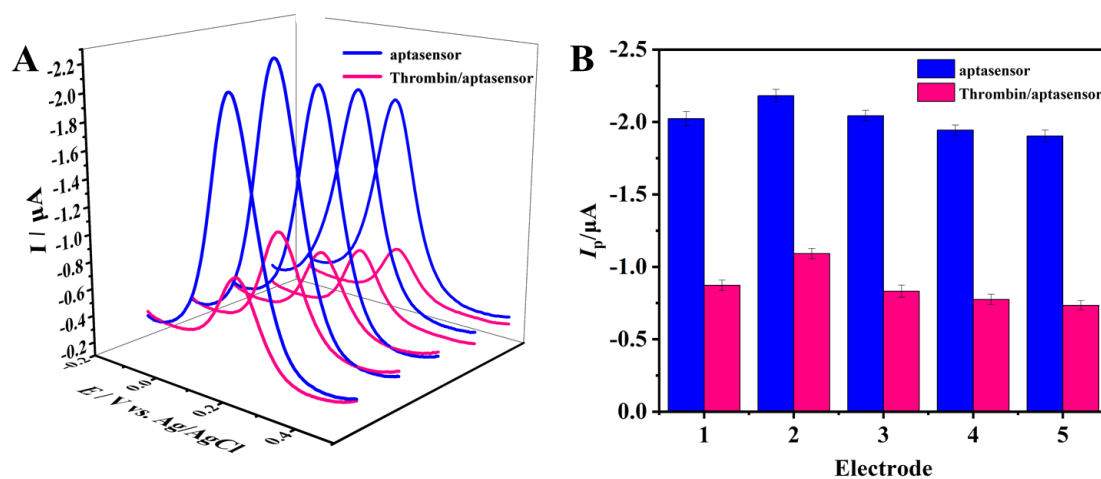

Figure S4. Reproducibility of the aptasensor

Table S1 Comparison of analytical performance of the proposed aptasensor with the previously reported thrombin aptasensors

| Materials                                | Methods | Linear ranges    | Limit of<br>Detection (fM) | Refers.   |
|------------------------------------------|---------|------------------|----------------------------|-----------|
| Fe <sub>2</sub> O <sub>3</sub> /graphene | DPV     | 10 pM to 4.0 nM  | 1000                       | [44]      |
| AuNPs-MXene                              | DPV     | 5 fM to 1 pM     | 1.7                        | [45]      |
| AgNPs/GO                                 | SWV     | 50 pM to 5 nM    | $3.0 \times 10^4$          | [46]      |
| C <sub>60</sub> /MWCNTs-PEI              | DPV     | 50 fM to 20 nM   | 5                          | [47]      |
| Ag-g-C <sub>3</sub> N <sub>4</sub>       | EIS     | 100 fM to 20 nM  | 38                         | [48]      |
| Au-CeO <sub>2</sub>                      | DPV     | 0.5 pM to 30 nM  | 250                        | [19]      |
| Cu <sup>2+</sup> -trithiocyanate complex | DPV     | 1.0 fM to 1.0 nM | 0.26                       | This work |

Table S2 Determination of thrombin in serum samples using the proposed biosensor

| Serum samples | Added (nM) | Detected (nM) | Recovery |
|---------------|------------|---------------|----------|
| 1             | 0.0500     | 0.0493        | 98.6%    |
| 2             | 0.500      | 0.486         | 97.2%    |
| 3             | 1.00       | 1.03          | 103%     |
